# Supplementary material
Source: PubMed Central journal article supplement (PMC6249581)
Supplement: jiy457_suppl_supplementary_tables_1.pdf [file jiy457_suppl_supplementary_tables_1.pdf]

**Table S1**

| <b>Target</b>  | <b>F</b>                 | <b>R</b>                  | <b>Source</b> |
|----------------|--------------------------|---------------------------|---------------|
| MIP-1 $\alpha$ | GCTCTGAGCCAGGTGTCATT     | GTCAGCGACGTACTCTTGGAC     | [7]           |
| IP-10          | GCCATTCATCCACAGTTGACA    | CATGGTGCTGACAGTGGAGTCT    | [7]           |
| IL-6           | CCTGAAAGCACTTGAAGAATTCC  | GGTATGCTAAGGCACAGCACACT   | [7]           |
| TNF- $\alpha$  | GGAGTGGCTGAGCCATCGT      | AGCTGGTTGTCTTTGAGAGACATG  | [7]           |
| IL-4           | CCACGGAGAAAGACCTCATCTG   | GGGTCACCTCATGTTGGAAATAAA  | [7]           |
| IL-5           | CAAAAAGAGCAGTGTGGCC      | ACCAAGGAACTCTTGCAGGT      | [7]           |
| IL-12          | GGCCTTCCCTGGCAGAA        | ATGCTGAAAGCCTGCAGTAGAAT   | [7]           |
| Mx2            | CCAGTAATGTGGACATTGCC     | CATCAACGACCTTGTCTTCAGTA   | [7]           |
| RPL18          | GTTTATGAGTCGCACTAACCG    | TGTTCTCTCGGCCAGGAA        | [7]           |
| IFN- $\gamma$  | GGCCATCCAGAGGAGCATAG     | TTTCTCCATGCTGCTGTTGAA     | [21]          |
| IL-1 $\beta$   | GGCTGATGCTCCCATTCCG      | CACGAGGCATTTCTGTTGTTCA    | [21]          |
| IL2            | GTGCACCCACTTCAAGCTCTAA   | AAGCTCCTGTAAGTCCAGCAGTAAC | [21]          |
| IL-10          | GTTGCCAAACCTTATCAGAAATGA | TTCTGGCCCGTGGTTCTCT       | [21]          |
