# Supplementary material
Source: PubMed Central journal article supplement (PMC6249581)
Supplement: jiy457_suppl_supplementary_tables_2.pdf [file jiy457_suppl_supplementary_tables_2.pdf]

**Table S2**

| <b>Antibody and source</b>                                    | <b>Dilution</b> | <b>Incubation time (minutes)</b> | <b>Antigen retrieval</b>                                                               | <b>Detection system</b>                                                                                                                               |
|---------------------------------------------------------------|-----------------|----------------------------------|----------------------------------------------------------------------------------------|-------------------------------------------------------------------------------------------------------------------------------------------------------|
| rabbit anti-MARV nucleoprotein [22]                           | 1:400           | 60                               | HIER (heat-induced epitope retrieval with decloaker) Citrate, pH 6.0; 125°C. 4 minutes | Peroxidase-labeled goat anti-rabbit. 5 µg/ml. 60 minutes, and ImmPACT NovaRED peroxidase substrate kit (#PI-1000-1 and #SK-4805; Vector Laboratories) |
| CD3 (Monoclonal Mouse Anti-Human CD3, #M 7254; Dako)          | 1 :100          | 30                               | HIER TRIS-EDTA, pH 9.0; 100°C. 20 minutes                                              | Alkaline Phosphatase labelled goat anti-mouse (Mouse-on-Farma AP-polymer, #MALP521H, and IP Warp Red, #IPK5024; Biocare Medical)                      |
| CD20 (Polyclonal Rabbit CD20, , #RB-9013P; Thermo Scientific) | 1:200           | 60                               | HIER Citrate, pH 6.0; 100°C. 10 minutes                                                | Alkaline Phosphatase labelled goat anti-rabbit (Rabbit-on-Farma AP-polymer, #RALP525H, and IP Warp Red, #IPK5024; Biocare Medical)                    |
| IBA1 (Polyclonal Rabbit Anti Iba1, #019-19741; Wako)          | 1 :500          | 60                               | HIER Citrate, pH 6.0; 120°C. 10 minutes                                                | Alkaline Phosphatase labelled goat anti-rabbit (Rabbit-on-Farma AP-polymer, #RALP525H, and IP Warp Red, #IPK5024; Biocare Medical)                    |
