# Supplementary material
Source: PubMed Central journal article supplement (PMC6249581)

# Figure S1

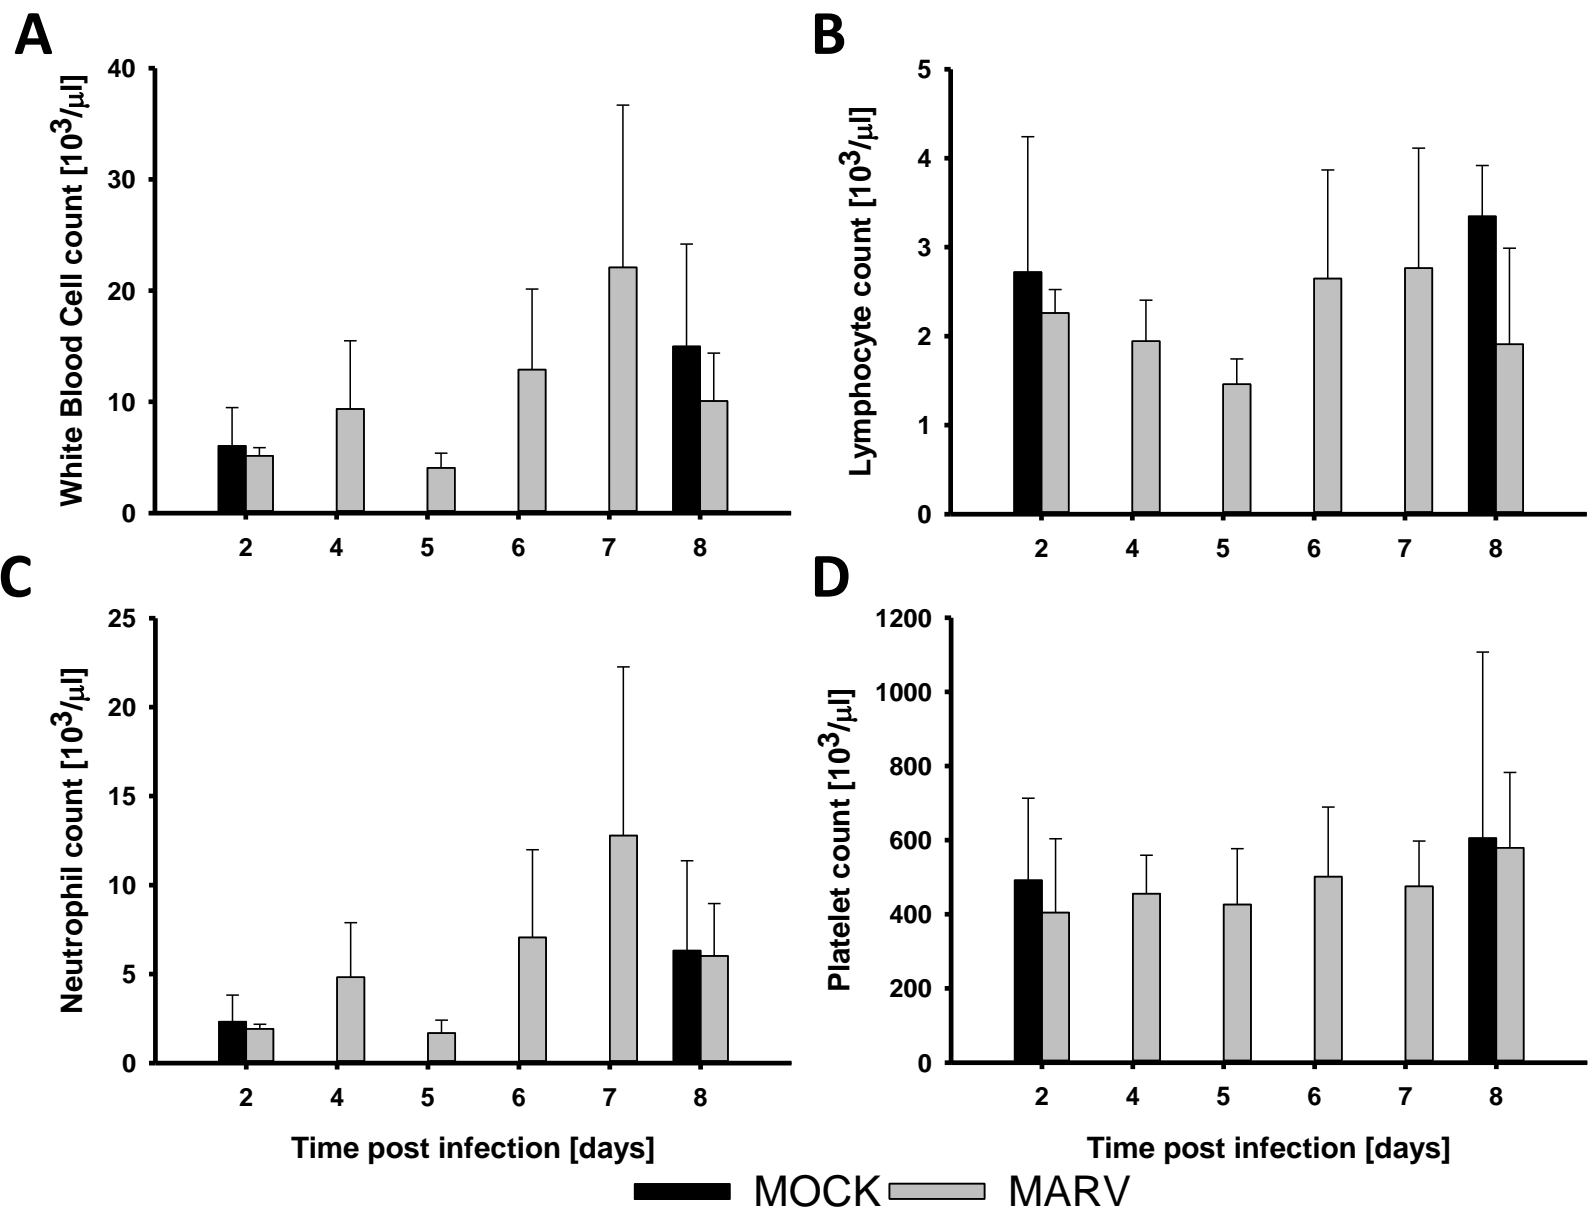

Supplement: jiy457_suppl_supplementary_figures_1.pdf [file jiy457_suppl_supplementary_figures_1.pdf]

# Figure S2

## Splenic lesion severity

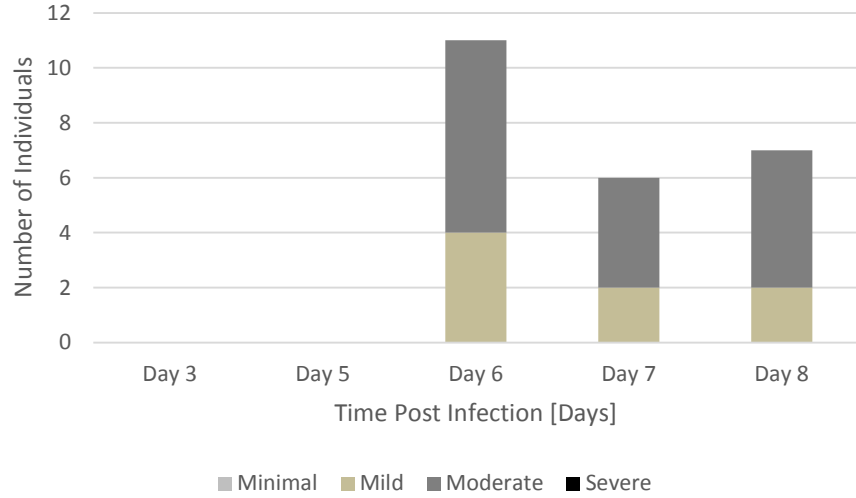

## Hepatic lesion severity

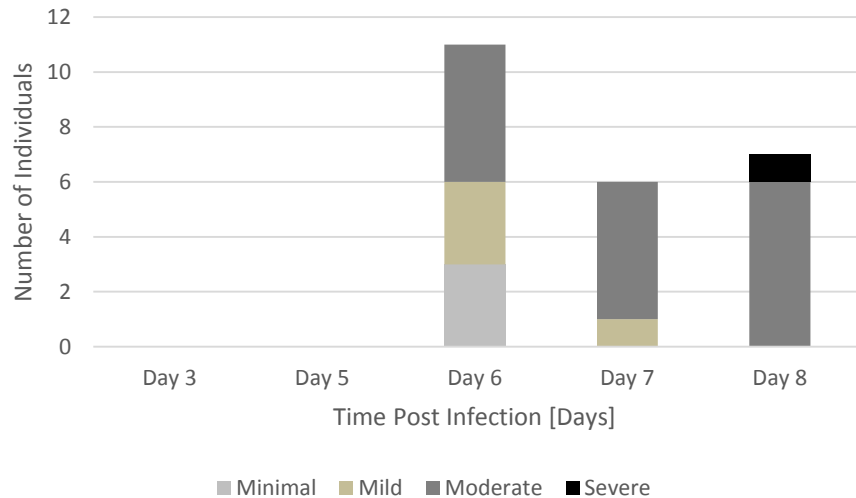

Supplement: jiy457_suppl_supplementary_figures_2.pdf [file jiy457_suppl_supplementary_figures_2.pdf]

# Figure S4

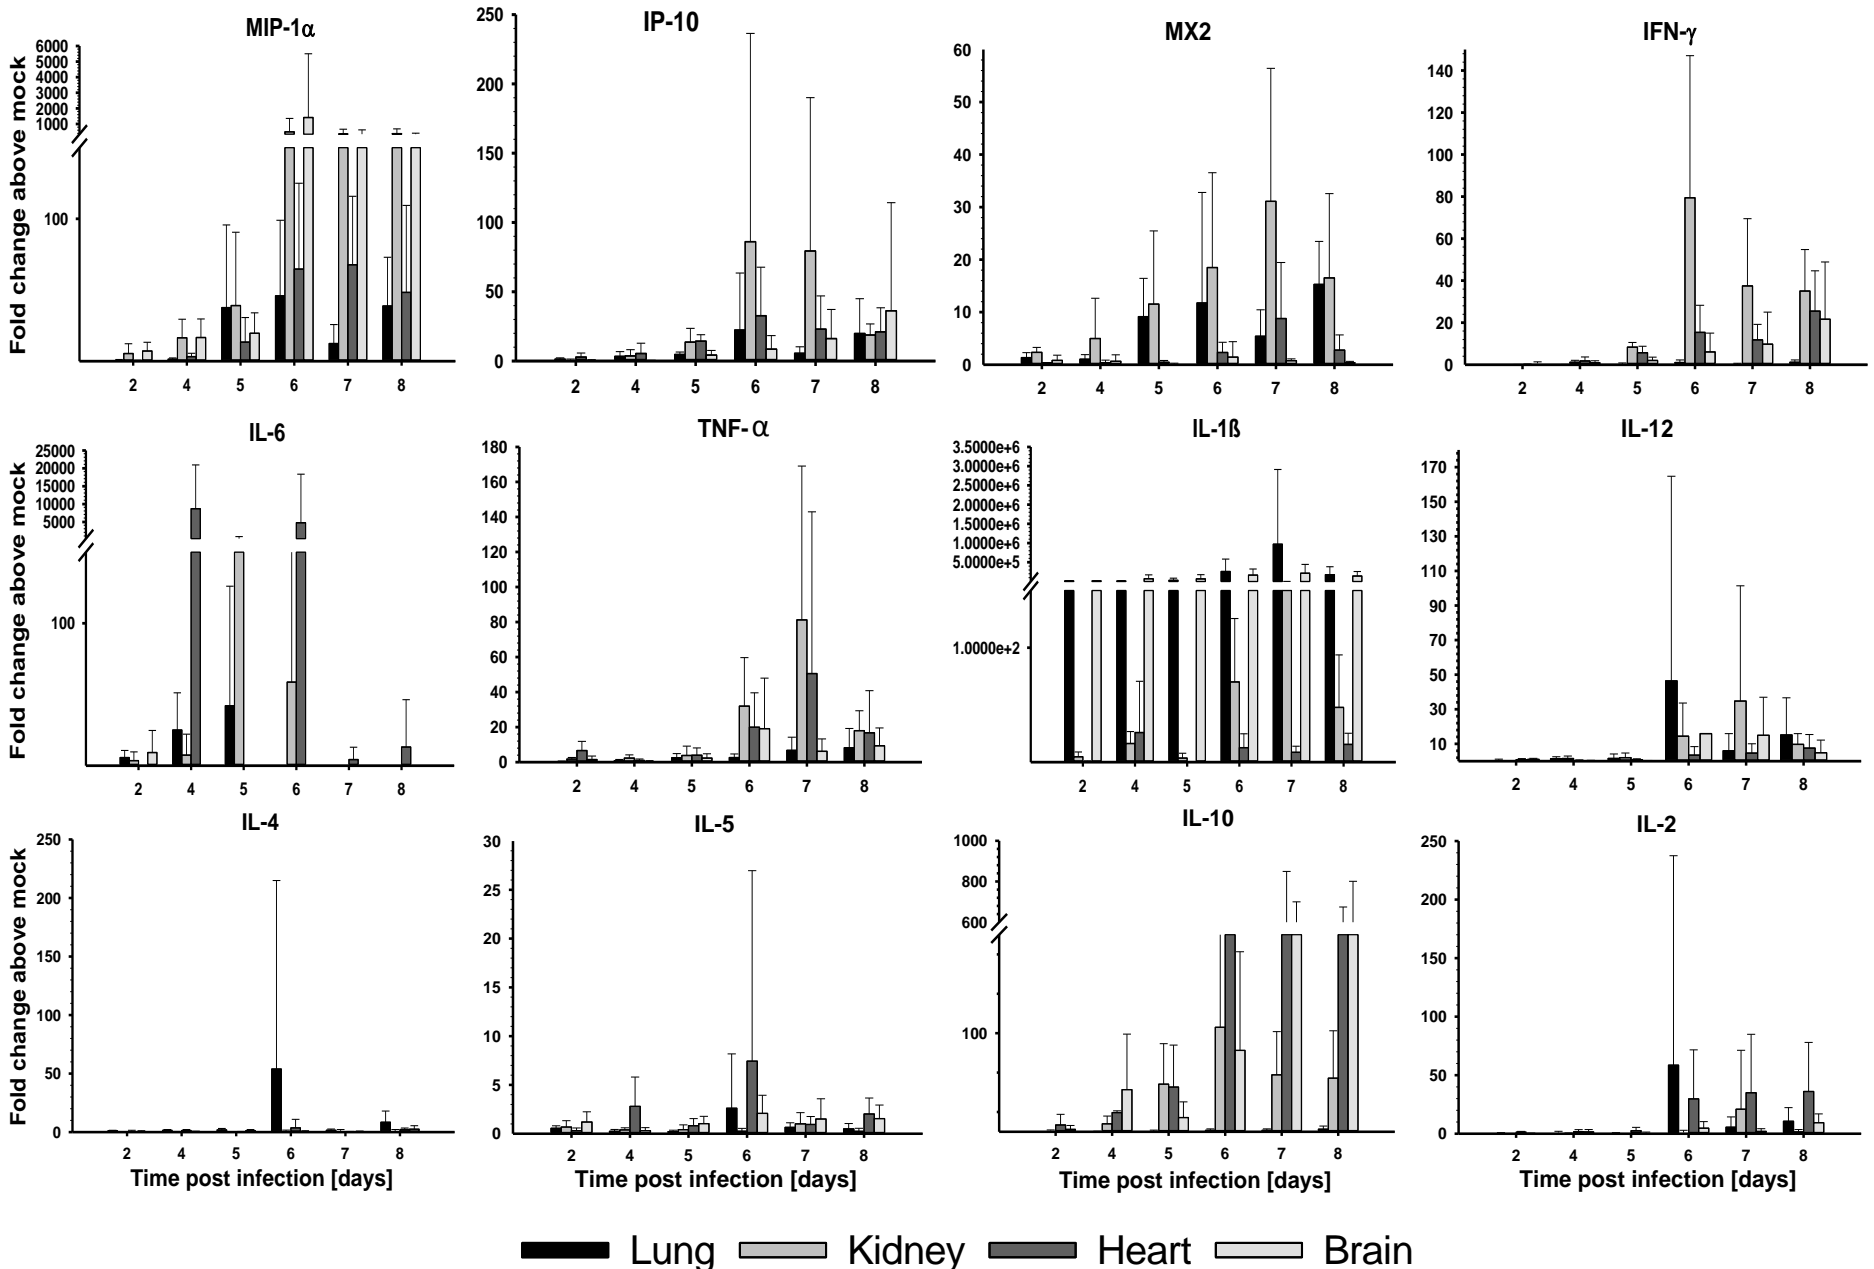

Supplement: jiy457_suppl_supplementary_figures_4.pdf [file jiy457_suppl_supplementary_figures_4.pdf]
